# Supplementary material for: Antibody Arrays Identified Cycle-Dependent Plasma Biomarker Candidates of Peritoneal Endometriosis
Source: MDPI journal article supplement (doi:10.3390/jpm12060852), 2022-05-24
Supplement: s1 [file s1]

## Supplementary Materials

**Table S1.** Differential proteins in the secretory and proliferative phase (unadjusted p-values)

| SECRETORY MENSTRUAL PHASE |                                                                                                      |            |       |          |         |           |
|---------------------------|------------------------------------------------------------------------------------------------------|------------|-------|----------|---------|-----------|
| Protein abbreviation      | Protein Full Name                                                                                    | Uniprot ID | logFC | FC       | p-value | adj.p-val |
| <b>PDCD1</b>              | Programmed cell death protein 1                                                                      | Q15116     | -0.89 | 0.539614 | 0.00099 | 0.15      |
| <b>BDNF</b>               | Brain-derived neurotrophic factor                                                                    | P23560     | -0.78 | 0.582367 | 0.00054 | 0.15      |
| <b>P2Y12</b>              | P2Y purinoceptor 12                                                                                  | Q9H244     | -0.75 | 0.594604 | 0.0063  | 0.28      |
| <b>B3GA1</b>              | Galactosylgalactosylxylosylprotein 3-beta-glucuronosyltransferase 1                                  | Q9P2W7     | -0.75 | 0.594604 | 0.0047  | 0.24      |
| <b>CRP</b>                | C-reactive protein                                                                                   | P02741     | -0.75 | 0.594604 | 0.028   | 0.62      |
| <b>CH3L1</b>              | Chitinase-3-like protein 1                                                                           | P36222     | -0.75 | 0.594604 | 0.0042  | 0.24      |
| <b>MELPH</b>              | Melanophilin, MLPH                                                                                   | Q9BV36     | -0.72 | 0.607097 | 0.00061 | 0.15      |
| <b>CD33</b>               | Myeloid cell surface antigen CD33                                                                    | P20138     | -0.71 | 0.61132  | 0.0027  | 0.19      |
| <b>CRLF2</b>              | Cytokine receptor-like factor 2                                                                      | Q9HC73     | -0.7  | 0.615572 | 0.0028  | 0.19      |
| <b>MLP3B</b>              | Microtubule-associated proteins 1A/1B light chain 3B                                                 | Q9GZQ8     | -0.7  | 0.615572 | 0.0023  | 0.19      |
| <b>GLPA</b>               | Glycophorin-A                                                                                        | P02724     | -0.69 | 0.619854 | 0.0019  | 0.19      |
| <b>PLGF</b>               | Placenta growth factor                                                                               | P49763     | -0.68 | 0.624165 | 0.16    | 0.92      |
| <b>CEAM5</b>              | Carcinoembryonic antigen-related cell adhesion molecule 5                                            | P06731     | -0.67 | 0.628507 | 0.0017  | 0.19      |
| <b>PYRG1</b>              | CTP synthase 1                                                                                       | P17812     | -0.66 | 0.632878 | 0.0026  | 0.19      |
| <b>RBM3</b>               | RNA-binding protein 3                                                                                | P98179     | -0.65 | 0.63728  | 0.0019  | 0.19      |
| <b>PTEN</b>               | Phosphatidylinositol 3,4,5-trisphosphate 3-phosphatase and dual-specificity protein phosphatase PTEN | P60484     | -0.65 | 0.63728  | 0.0021  | 0.19      |
| <b>TSN16</b>              | Tetraspanin-16                                                                                       | Q9UKR8     | -0.65 | 0.63728  | 0.0013  | 0.15      |
| <b>LYAM3</b>              | P-selectin                                                                                           | P16109     | -0.65 | 0.63728  | 0.008   | 0.34      |
| <b>IL18</b>               | Interleukin-18                                                                                       | Q14116     | -0.65 | 0.63728  | 0.00074 | 0.15      |
| <b>IFIT2</b>              | Interferon-induced protein with tetratricopeptide repeats 2                                          | P09913     | -0.65 | 0.63728  | 0.003   | 0.19      |
| <b>RRAGC</b>              | Ras-related GTP-binding protein C                                                                    | Q9HB90     | -0.64 | 0.641713 | 0.00044 | 0.15      |
| <b>DHRS2</b>              | Dehydrogenase/reductase SDR family member 2, mitochondrial                                           | Q13268     | -0.64 | 0.641713 | 0.00023 | 0.15      |
| <b>MMP1</b>               | Interstitial collagenase                                                                             | P03956     | -0.64 | 0.641713 | 0.0004  | 0.15      |
| <b>CEAM1</b>              | Carcinoembryonic antigen-related cell adhesion molecule 1                                            | P13688     | -0.63 | 0.646176 | 0.027   | 0.62      |
| <b>TNFB</b>               | Lymphotoxin-alpha                                                                                    | P01374     | -0.63 | 0.646176 | 0.0041  | 0.24      |
| <b>SPA9</b>               | Serpin A9                                                                                            | Q86WD7     | -0.63 | 0.646176 | 0.015   | 0.45      |
| <b>TMM54</b>              | Transmembrane protein 54                                                                             | Q969K7     | -0.62 | 0.650671 | 0.0002  | 0.15      |
| <b>ID3</b>                | DNA-binding protein inhibitor ID-3                                                                   | Q02535     | -0.62 | 0.650671 | 0.0028  | 0.19      |
| <b>MAD4</b>               | Max dimerization protein 4                                                                           | Q14582     | -0.62 | 0.650671 | 0.0024  | 0.19      |
| <b>PRTN3</b>              | Myeloblastin                                                                                         | P24158     | -0.62 | 0.650671 | 0.0049  | 0.24      |
| <b>IL10</b>               | Interleukin-10                                                                                       | P22301     | -0.61 | 0.655197 | 0.028   | 0.62      |
| <b>MK12</b>               | Mitogen-activated protein kinase 12                                                                  | P53778     | -0.61 | 0.655197 | 0.00078 | 0.15      |
| <b>NFAC4</b>              | Nuclear factor of activated T-cells, cytoplasmic 4                                                   | Q14934     | -0.61 | 0.655197 | 0.019   | 0.52      |
| <b>IFNA1</b>              | Interferon alpha-1/13                                                                                | P01562     | -0.61 | 0.655197 | 0.0013  | 0.15      |

|                                      |                                                       |                   |              |           |                |                  |
|--------------------------------------|-------------------------------------------------------|-------------------|--------------|-----------|----------------|------------------|
| <b>SDC1</b>                          | Syndecan-1                                            | P18827            | -0.61        | 0.655197  | 0.013          | 0.44             |
| <b>CCL7</b>                          | C-C motif chemokine 7                                 | P80098            | -0.61        | 0.655197  | 0.026          | 0.62             |
| <b>FABPI</b>                         | Fatty acid-binding protein, intestinal                | P12104            | -0.61        | 0.655197  | 0.0062         | 0.28             |
| <b>AKA12</b>                         | A-kinase anchor protein 12                            | Q02952            | -0.6         | 0.659754  | 0.003          | 0.19             |
| <b>CCL11</b>                         | Eotaxin                                               | P51671            | -0.59        | 0.664343  | 0.00084        | 0.15             |
| <b>KI67</b>                          | Proliferation marker protein Ki-67                    | P46013            | -0.59        | 0.664343  | 0.04           | 0.75             |
| <b>GAS6</b>                          | Growth arrest-specific protein 6                      | Q14393            | -0.59        | 0.664343  | 0.015          | 0.45             |
| <b>MRPP3</b>                         | Mitochondrial ribonuclease P catalytic subunit        | O15091            | -0.58        | 0.668964  | 0.019          | 0.52             |
| <b>AREG</b>                          | Amphiregulin                                          | P15514            | -0.57        | 0.673617  | 0.00064        | 0.15             |
| <b>MICA</b>                          | MHC class I polypeptide-related sequence A            | Q29983            | -0.57        | 0.673617  | 0.028          | 0.62             |
| <b>TR11B</b>                         | Tumor necrosis factor receptor superfamily member 11B | O00300            | -0.55        | 0.68302   | 0.028          | 0.62             |
| <b>CD15</b>                          | /                                                     | /                 | -0.55        | 0.68302   | 0.017          | 0.5              |
| <b>K2C8</b>                          | Keratin, type II cytoskeletal 8                       | P05787            | -0.55        | 0.68302   | 0.0012         | 0.15             |
| <b>ULBP1</b>                         | UL16-binding protein 1                                | Q9BZM6            | -0.53        | 0.692555  | 0.018          | 0.52             |
| <b>C2C4B</b>                         | C2 calcium-dependent domain-containing protein 4B     | A6NLJ0            | -0.53        | 0.692555  | 0.0038         | 0.23             |
| <b>CD28</b>                          | T-cell-specific surface glycoprotein CD28             | P10747            | -0.52        | 0.697372  | 0.0044         | 0.24             |
| <b>DAF</b>                           | Complement decay-accelerating factor, CD55            | P08174            | -0.51        | 0.700672  | 0.00540        | 0.25223          |
| <b>FABPL</b>                         | Fatty acid-binding protein, liver                     | P07148            | -0.51        | 0.702222  | 0.012          | 0.43             |
| <b>PROLIFERATIVE MENSTRUAL PHASE</b> |                                                       |                   |              |           |                |                  |
| <b>Protein abbreviation</b>          | <b>Protein Full Name</b>                              | <b>Uniprot ID</b> | <b>logFC</b> | <b>FC</b> | <b>p-value</b> | <b>adj.p-val</b> |
| <b>TYRO3</b>                         | Tyrosine-protein kinase receptor                      | Q06418            | 1.09         | 2.25      | 0.002864       | 0.231156         |
| <b>TOP1</b>                          | DNA topoisomerase 1                                   | P11387            | 1.05         | 2.18      | 0.016278       | 0.429842         |
| <b>ICOS</b>                          | Inducible T-cell costimulator                         | Q9Y6W8            | 0.84         | 1.86      | 0.010292       | 0.360623         |
| <b>RN141</b>                         | RING finger protein 141                               | Q8WVD5            | 0.75         | 1.74      | 0.000212       | 0.069074         |
| <b>CSF3</b>                          | Granulocyte colony-stimulating factor                 | P09919            | 0.74         | 1.73      | 0.002918       | 0.231156         |
| <b>FGF4</b>                          | Fibroblast growth factor 4                            | P08620            | 0.72         | 1.71      | 0.008054       | 0.33349          |
| <b>ULBP1</b>                         | UL16-binding protein 1                                | Q9BZM6            | 0.71         | 1.69      | 0.003365       | 0.245555         |
| <b>TNFB</b>                          | Lymphotoxin-alpha                                     | P01374            | 0.70         | 1.68      | 0.032361       | 0.510999         |
| <b>ERBB3</b>                         | Receptor tyrosine-protein kinase erbB-3               | P21860            | 0.64         | 1.61      | 0.015696       | 0.429842         |
| <b>SMUF1</b>                         | E3 ubiquitin-protein ligase SMURF1                    | Q9HCE7            | 0.62         | 1.58      | 0.005909       | 0.329705         |
| <b>SMAD7</b>                         | Mothers against decapentaplegic homolog 7             | O15105            | 0.59         | 1.55      | 0.002633       | 0.228419         |
| <b>ASNS</b>                          | Asparagine synthetase [glutamine-hydrolyzing]         | P08243            | 0.57         | 1.53      | 0.046593       | 0.605458         |
| <b>CD4</b>                           | T-cell surface glycoprotein CD4                       | P01730            | 0.56         | 1.52      | 0.014497       | 0.419263         |
| <b>RN141</b>                         | RING finger protein 141                               | Q8WVD5            | 0.55         | 1.50      | 0.000361       | 0.082273         |
| <b>MK08</b>                          | Mitogen-activated protein kinase 8                    | P45983            | 0.54         | 1.49      | 0.009216       | 0.344338         |
| <b>SEP15</b>                         | Selenoprotein F                                       | O60613            | 0.51         | 1.46      | 0.029879       | 0.504069         |
| <b>BLNK</b>                          | B-cell linker protein                                 | Q8WV28            | -0.51        | 0.68      | 0.005169       | 0.329705         |
| <b>MMP1</b>                          | Interstitial collagenase                              | P03956            | -0.51        | 0.68      | 0.018353       | 0.445853         |
| <b>DAND5</b>                         | DAN domain family member 5                            | Q8N907            | -0.51        | 0.68      | 0.022762       | 0.455168         |

|                   |                                                           |        |       |      |          |          |
|-------------------|-----------------------------------------------------------|--------|-------|------|----------|----------|
| <b>BID</b>        | BH3-interacting domain death agonist                      | P55957 | -0.51 | 0.68 | 0.024211 | 0.455168 |
| <b>BMF</b>        | Bcl-2-modifying factor                                    | Q96LC9 | -0.52 | 0.68 | 0.000795 | 0.120637 |
| <b>IL25</b>       | Interleukin-25                                            | Q9H293 | -0.52 | 0.68 | 0.005581 | 0.329705 |
| <b>FGF23</b>      | Fibroblast growth factor 23                               | Q9GZV9 | -0.53 | 0.67 | 0.037835 | 0.555935 |
| <b>IL5</b>        | Interleukin-5                                             | P05113 | -0.53 | 0.67 | 0.040623 | 0.566374 |
| <b>CD5</b>        | T-cell surface glycoprotein CD5                           | P06127 | -0.53 | 0.67 | 0.04419  | 0.587694 |
| <b>IRF4</b>       | Interferon regulatory factor 4                            | Q15306 | -0.54 | 0.67 | 0.006334 | 0.329705 |
| <b>CEAM7</b>      | Carcinoembryonic antigen-related cell adhesion molecule 7 | Q14002 | -0.54 | 0.67 | 0.009578 | 0.349011 |
| <b>BGLR</b>       | Beta-glucuronidase                                        | P08236 | -0.54 | 0.67 | 0.022315 | 0.455168 |
| <b>1433B</b>      | 14-3-3 protein beta/alpha                                 | P31946 | -0.55 | 0.66 | 0.012148 | 0.390734 |
| <b>KPCG</b>       | Protein kinase C gamma type                               | P05129 | -0.55 | 0.66 | 0.016945 | 0.434598 |
| <b>PSA2</b>       | Proteasome subunit alpha type-2                           | P25787 | -0.55 | 0.66 | 0.032815 | 0.510999 |
| <b>CD53</b>       | Leukocyte surface antigen CD53                            | P19397 | -0.56 | 0.66 | 0.006555 | 0.33099  |
| <b>GRP</b>        | Gastrin-releasing peptide                                 | P07492 | -0.56 | 0.66 | 0.011694 | 0.387404 |
| <b>TNR5</b>       | Tumor necrosis factor receptor superfamily member 5       | P25942 | -0.56 | 0.66 | 0.018041 | 0.444205 |
| <b>CXL16</b>      | C-X-C motif chemokine 16                                  | Q9H2A7 | -0.57 | 0.66 | 0.001841 | 0.186346 |
| <b>PGK1</b>       | Phosphoglycerate kinase 1                                 | P00558 | -0.58 | 0.65 | 0.016798 | 0.434598 |
| <b>IL17C</b>      | Interleukin-17C                                           | Q9P0M4 | -0.59 | 0.65 | 0.008499 | 0.344097 |
| <b>ICAM3</b>      | Intercellular adhesion molecule 3                         | P32942 | -0.59 | 0.65 | 0.00926  | 0.344338 |
| <b>ETS1</b>       | Protein C-ets-1                                           | P14921 | -0.59 | 0.65 | 0.025355 | 0.461959 |
| <b>IL19</b>       | Interleukin-19                                            | Q9UHD0 | -0.60 | 0.64 | 0.000175 | 0.069074 |
| <b>HBEGF</b>      | Proheparin-binding EGF-like growth factor                 | Q99075 | -0.60 | 0.64 | 0.006903 | 0.33099  |
| <b>OX2G</b>       | OX-2 membrane glycoprotein                                | P41217 | -0.60 | 0.64 | 0.009035 | 0.344338 |
| <b>CRTAM</b>      | Cytotoxic and regulatory T-cell molecule                  | O95727 | -0.60 | 0.64 | 0.039634 | 0.566374 |
| <b>I13R2</b>      | Interleukin-13 receptor subunit alpha-2                   | Q14627 | -0.61 | 0.64 | 0.021524 | 0.455168 |
| <b>TGFA</b>       | Protransforming growth factor alpha                       | P01135 | -0.61 | 0.64 | 0.023683 | 0.455168 |
| <b>IL33_MOUSE</b> | Interleukin-33                                            | Q8BVZ5 | -0.62 | 0.63 | 0.007876 | 0.33349  |
| <b>CCL4</b>       | C-C motif chemokine 4                                     | P13236 | -0.62 | 0.63 | 0.031859 | 0.510999 |
| <b>CASP3</b>      | Caspase-3                                                 | P42574 | -0.63 | 0.63 | 0.003504 | 0.245555 |
| <b>IL1RA</b>      | Interleukin-1 receptor antagonist protein                 | P18510 | -0.64 | 0.62 | 0.007418 | 0.33349  |
| <b>PD1L1</b>      | Programmed cell death 1 ligand 1                          | Q9NZQ7 | -0.65 | 0.62 | 0.007569 | 0.33349  |
| <b>S10A2</b>      | Protein S100-A2                                           | P29034 | -0.66 | 0.61 | 0.006288 | 0.329705 |
| <b>CYTB</b>       | Cystatin-B                                                | P04080 | -0.67 | 0.61 | 0.027167 | 0.47141  |
| <b>CD9</b>        | CD9 antigen                                               | P21926 | -0.68 | 0.60 | 0.000227 | 0.069074 |
| <b>HMGA1</b>      | High mobility group protein HMG-I/HMG-Y                   | P17096 | -0.68 | 0.60 | 0.000725 | 0.120011 |
| <b>CADH3</b>      | Cadherin-3                                                | P22223 | -0.68 | 0.60 | 0.017739 | 0.442739 |
| <b>SPIT1</b>      | Kunitz-type protease inhibitor 1                          | O43278 | -0.69 | 0.60 | 0.00149  | 0.159746 |
| <b>AGRP</b>       | Agouti-related protein                                    | O00253 | -0.70 | 0.59 | 0.01087  | 0.37346  |
| <b>DDB2</b>       | DNA damage-binding protein 2                              | Q92466 | -0.72 | 0.59 | 0.014364 | 0.419263 |

|              |                                                                |        |       |      |          |          |
|--------------|----------------------------------------------------------------|--------|-------|------|----------|----------|
| <b>ADA15</b> | Disintegrin and metalloproteinase domain-containing protein 15 | Q13444 | -0.74 | 0.58 | 0.002307 | 0.221183 |
| <b>TRML1</b> | Trem-like transcript 1 protein                                 | Q86YW5 | -0.74 | 0.58 | 0.005315 | 0.329705 |
| <b>NTF4</b>  | Neurotrophin-4                                                 | P34130 | -0.74 | 0.58 | 0.006056 | 0.329705 |
| <b>TNR18</b> | Tumor necrosis factor receptor superfamily member 18           | Q9Y5U5 | -0.77 | 0.56 | 0.020822 | 0.455168 |
| <b>TNF6B</b> | Tumor necrosis factor receptor superfamily member 6B           | O95407 | -0.77 | 0.56 | 0.024232 | 0.455168 |
| <b>TNFL6</b> | Tumor necrosis factor ligand superfamily member 6              | P48023 | -0.79 | 0.56 | 0.005075 | 0.329705 |
| <b>TNR18</b> | Tumor necrosis factor receptor superfamily member 18           | Q9Y5U5 | -0.80 | 0.55 | 0.006792 | 0.33099  |
| <b>CLD1</b>  | Claudin-1                                                      | O95832 | -0.80 | 0.55 | 0.016218 | 0.429842 |
| <b>KIT</b>   | Mast/stem cell growth factor receptor Kit                      | P10721 | -0.82 | 0.54 | 0.007886 | 0.33349  |
| <b>VTDB</b>  | Vitamin D-binding protein                                      | P02774 | -0.84 | 0.54 | 0.034213 | 0.510999 |
| <b>MIF</b>   | Macrophage migration inhibitory factor                         | P14174 | -0.94 | 0.50 | 0.000902 | 0.126351 |
| <b>I18BP</b> | Interleukin-18-binding protein                                 | O95998 | -0.97 | 0.49 | 0.000542 | 0.098827 |
| <b>CALB1</b> | Calbindin                                                      | P05937 | -0.97 | 0.49 | 0.023434 | 0.455168 |
| <b>LEP</b>   | Leptin                                                         | P41159 | -1.06 | 0.46 | 0.000471 | 0.095348 |
| <b>PGH2</b>  | Prostaglandin G/H synthase 2                                   | P35354 | -1.34 | 0.37 | 0.001115 | 0.145082 |
| <b>CEBPA</b> | CCAAT/enhancer-binding protein alpha                           | P49715 | -1.37 | 0.36 | 0.000279 | 0.07255  |
| <b>EDN1</b>  | Endothelin-1                                                   | P05305 | -1.75 | 0.27 | 0.003407 | 0.245555 |

**Abbreviations:** FC, fold change calculated from logFC; logFC, logarithmic fold change calculated on the basis of 2; adj.p-val, p-values adjusted for multiple testing

**A**

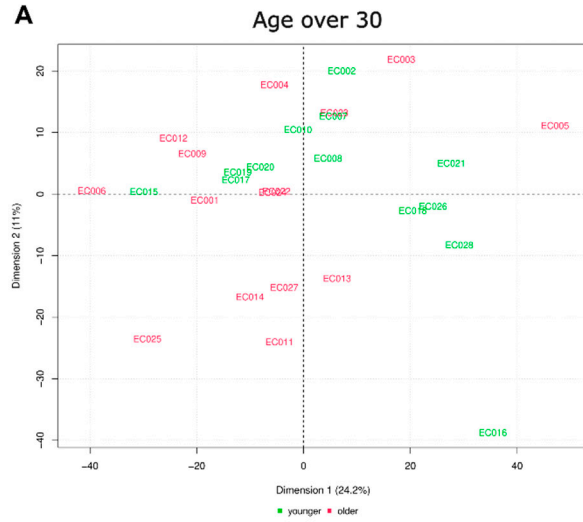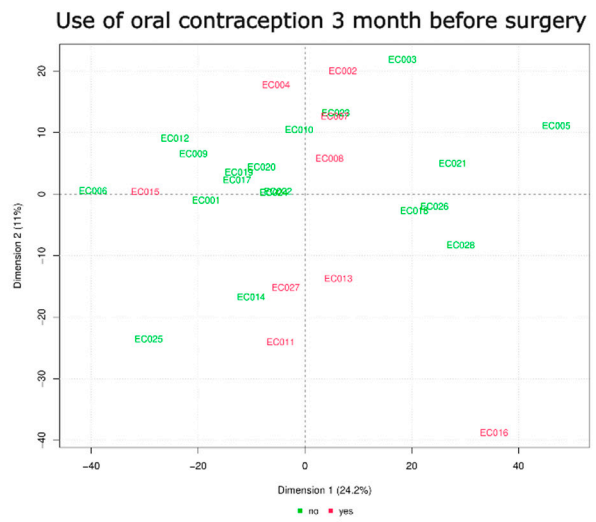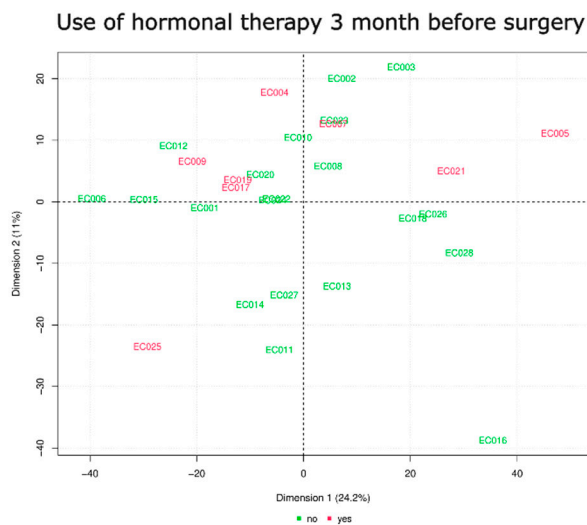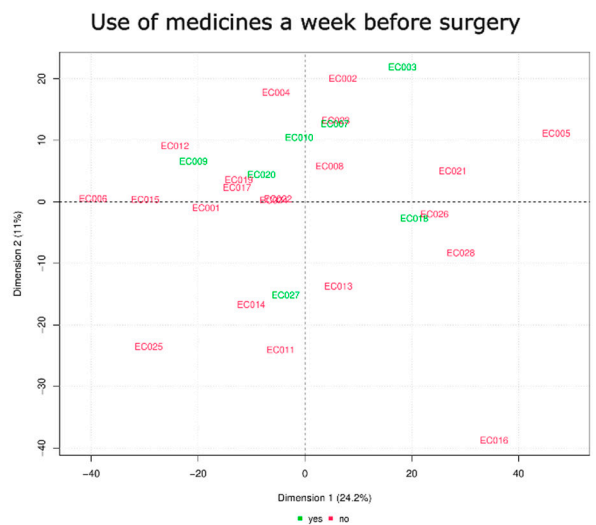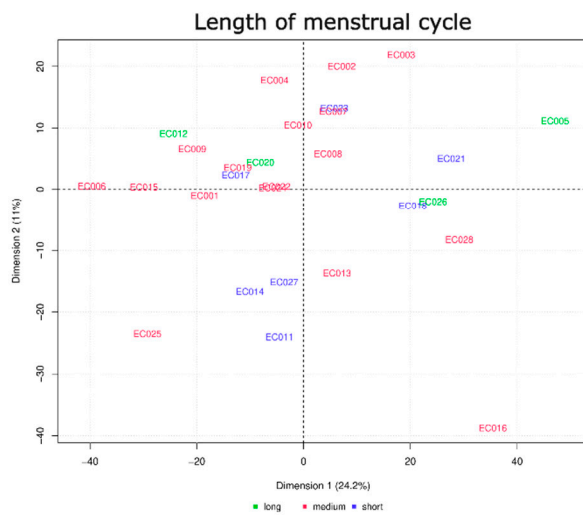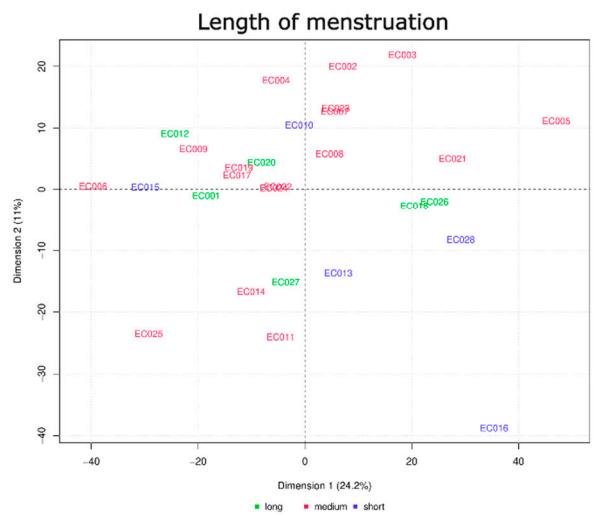

**B**

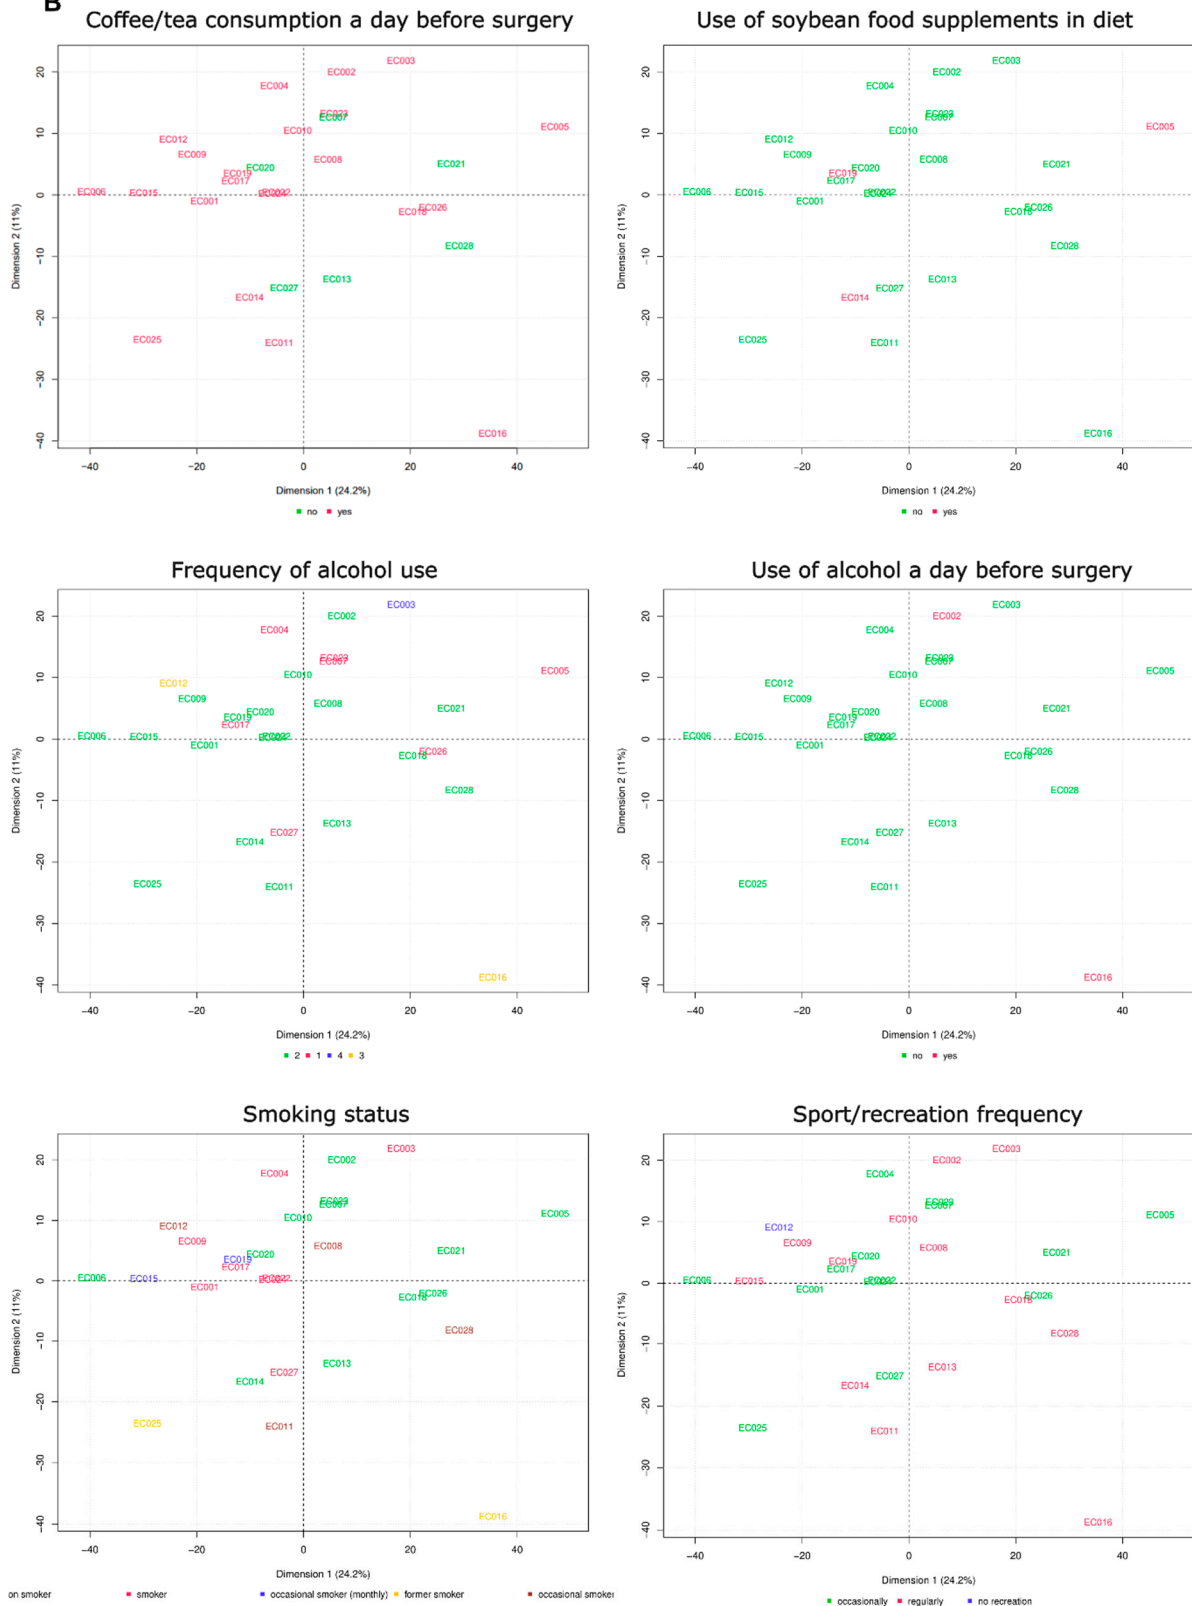

**Legend:** 1 - Never, 2-Rarely, 3-Once a week, 4- Two to three times a week, 5- More than 3 times a week

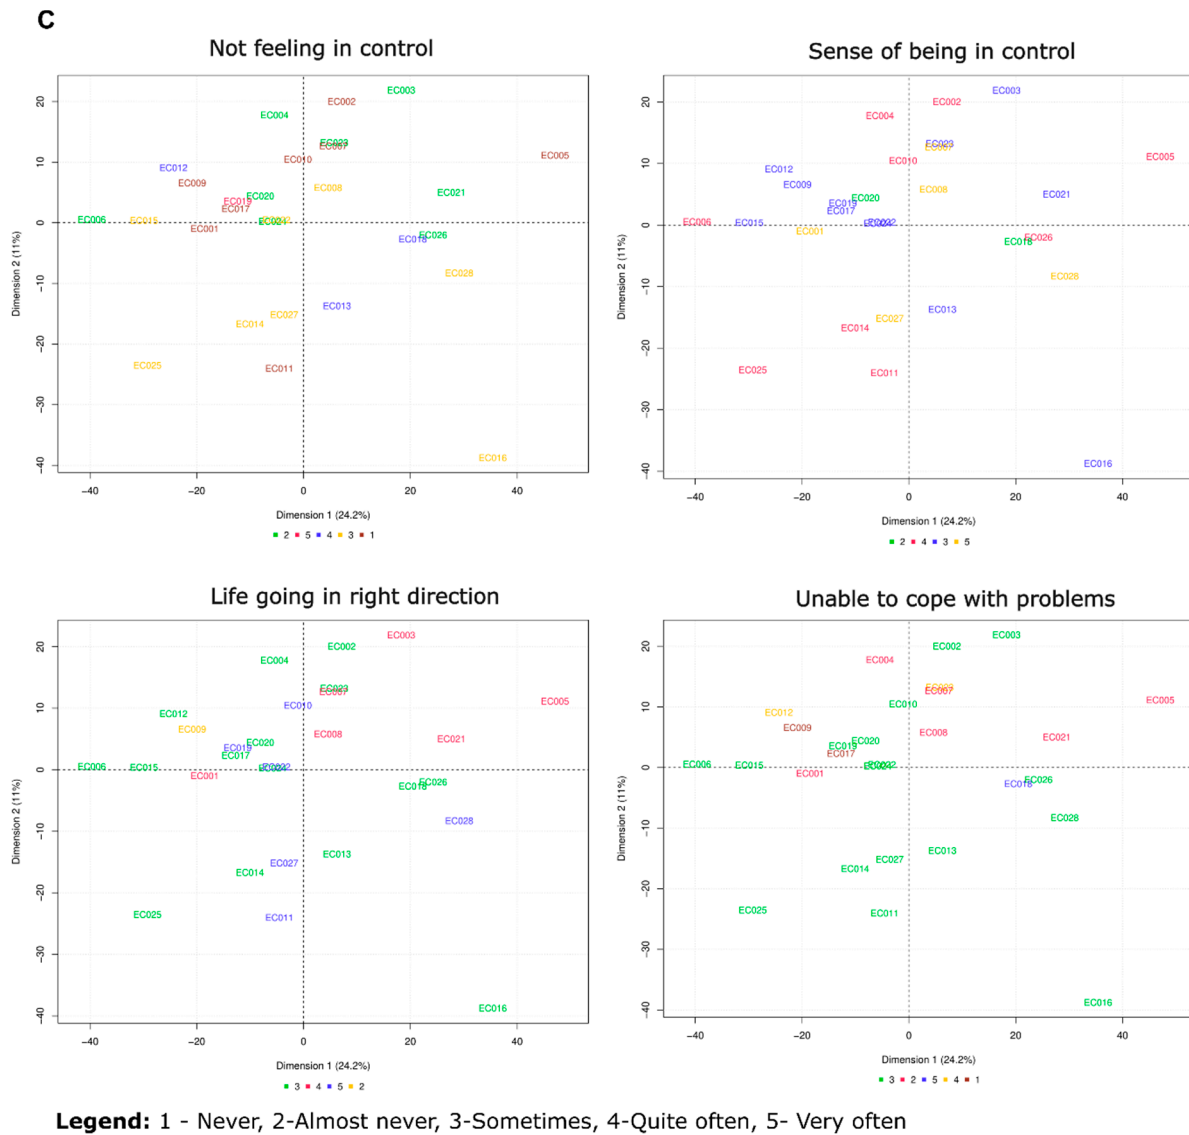

**Figure S1.** PCA analysis based on complete array data and different patient characteristics . A) gynecological characteristics B) diet and lifestyle characteristics and C) impact of stress. The presented data are for the secretory group.

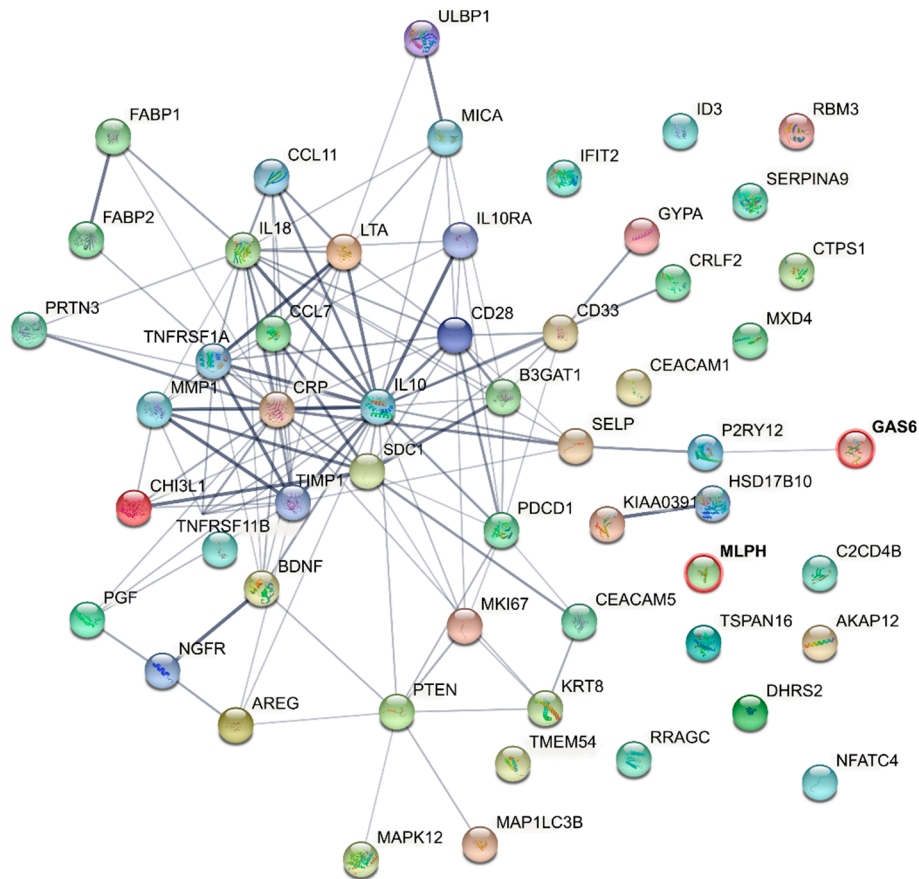

**Figure S2.** Interactions of the identified differential proteins between patients with peritoneal endometriosis and controls patients in the secretory group. The network includes proteins that reached difference between cases and controls based on  $\log FC > 0.5$  and unadjusted  $p < 0.05$ . The confidence score threshold was set at 0.4 (medium). The figure was acquired online at <http://string-db.org/>, accessed on January 18 2022 [28].



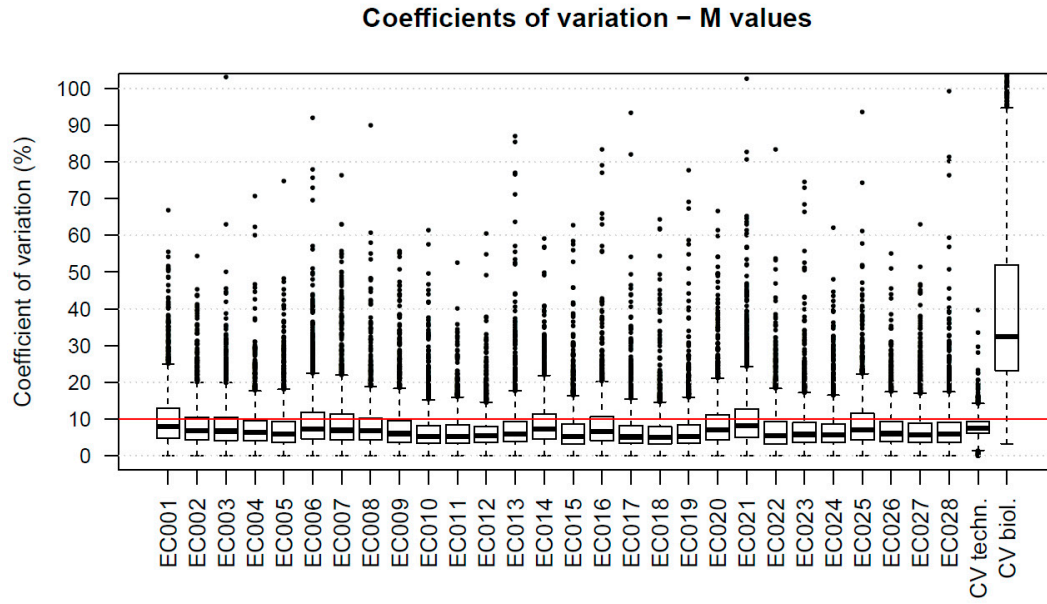

**Figure S3.** Array-specific distributions of coefficients of variation (CV) for the four technical replicates measured by each antibody. The two rightmost columns represent the average technical variation, i.e. the distribution of the antibody-specific CVs over all arrays (CV techn.), and the biological variation across all samples (CV biol.), respectively.
